# Supplementary material for: Unraveling template-free fabrication of carbon nitride nanorods codoped with Pt and Pd for efficient electrochemical and photoelectrochemical carbon monoxide oxidation at room temperature
Source: Royal Society of Chemistry journal article supplement (doi:10.1039/c9nr02571e), 2019-01-01
Supplement: c9nr02571e1.pdf [file c9nr02571e1.pdf]

## Unraveling Template-free Fabrication of Carbon Nitride Nanorods Codoped with for Efficient Electrochemical and Photoelectrochemical Carbon Monoxide Oxidation at Room Temperature

Kamel Eid, Mostafa H. Sliem, and Aboubakr M. Abdullah\*

Center for advanced materials, Qatar University, Doha 2713, Qatar.

\*E-mail: bakr@qu.edu.qa

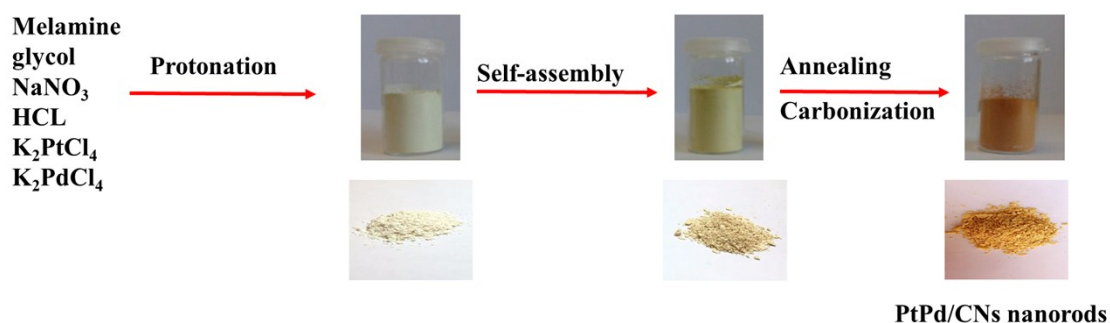

**Figure S1.** Schematic shows the synthesis process of PtPd/CNs nanorods

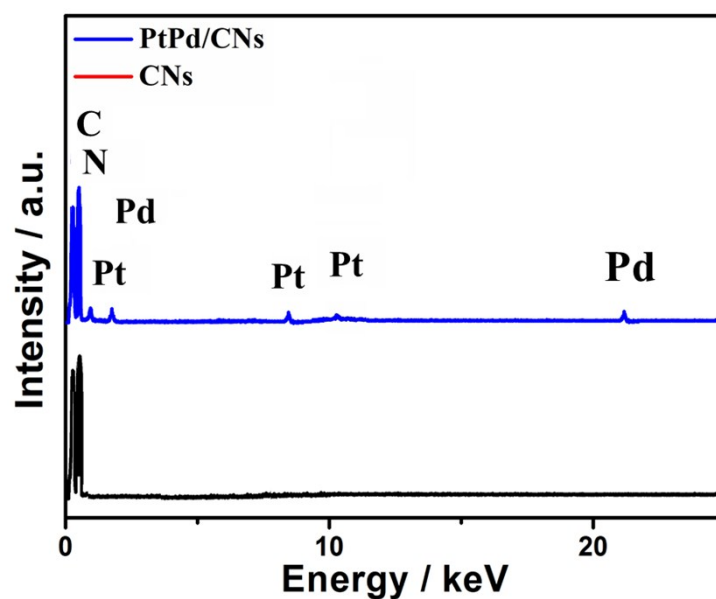

**Figure S2.** EDX analysis of PtPd/CNs nanorods relative to metal-free CNs nanorods.

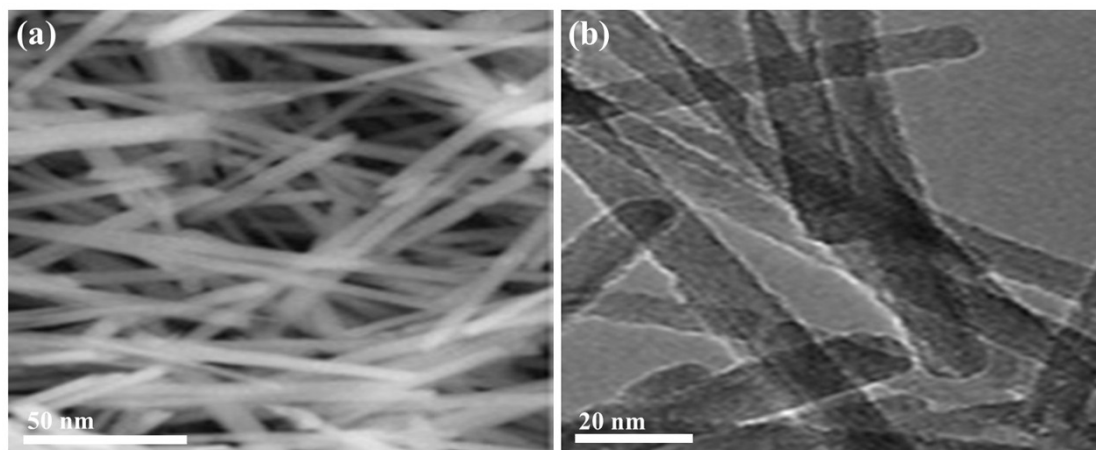

**Figure S3** (a) SEM image and (b) TEM image of metal-free CNs nanorods.

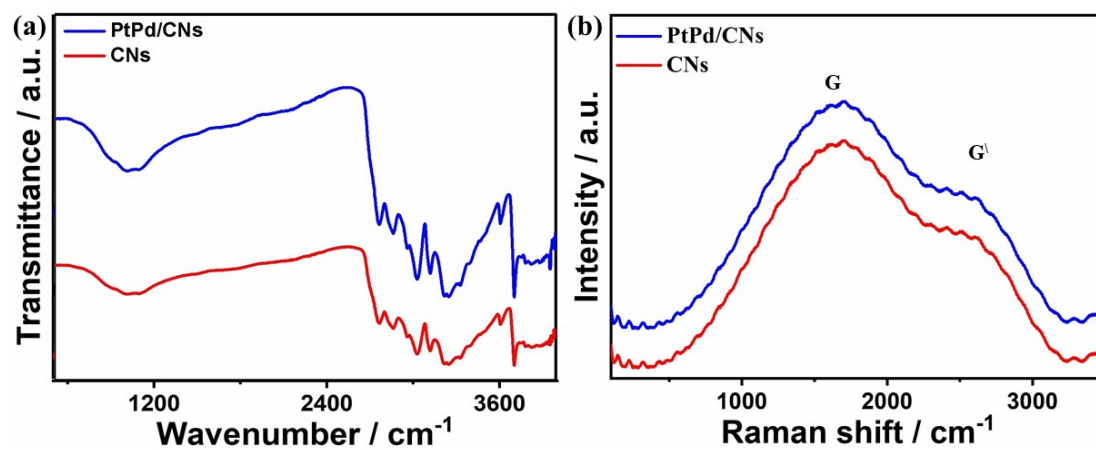

**Figure S4.** (a) FTIR spectra and (b) Raman spectra of PtPd/CNs nanorods relative to CNs nanorods.

**Table S1.** Comparison the Surface area of our developed CNs nanorods with previous reported CNs-based nanostructures

| Catalyst                      | Morphology                                                                                                                    | BET surface area m <sup>2</sup> g <sup>-1</sup> | Reference |
|-------------------------------|-------------------------------------------------------------------------------------------------------------------------------|-------------------------------------------------|-----------|
| CNs                           | Nanorods                                                                                                                      | 155.2                                           | Our work  |
| CN600                         | Long Needles                                                                                                                  | 99                                              | 1         |
| CNs                           | Nanotubes<br>Nanofibers                                                                                                       | 32.27<br>12.96                                  | 2         |
| CNs                           | Nanosheets                                                                                                                    | 46.2                                            | 3         |
| CNs                           | Nanosheets                                                                                                                    | 84.2                                            | 4         |
| CNs- Triton-0.6               | Nanoporous sheets                                                                                                             | 116                                             | 51        |
| C <sub>3</sub> N <sub>4</sub> | Nanoporous sheets                                                                                                             | 123                                             | 6         |
| CN-24-1.0<br>1=               | Nanoporous sheets<br><hr/> 24 represents size of colloidal SiO <sub>2</sub><br>1 represents SiO <sub>2</sub> /cyanamide ratio | 130                                             | 7         |

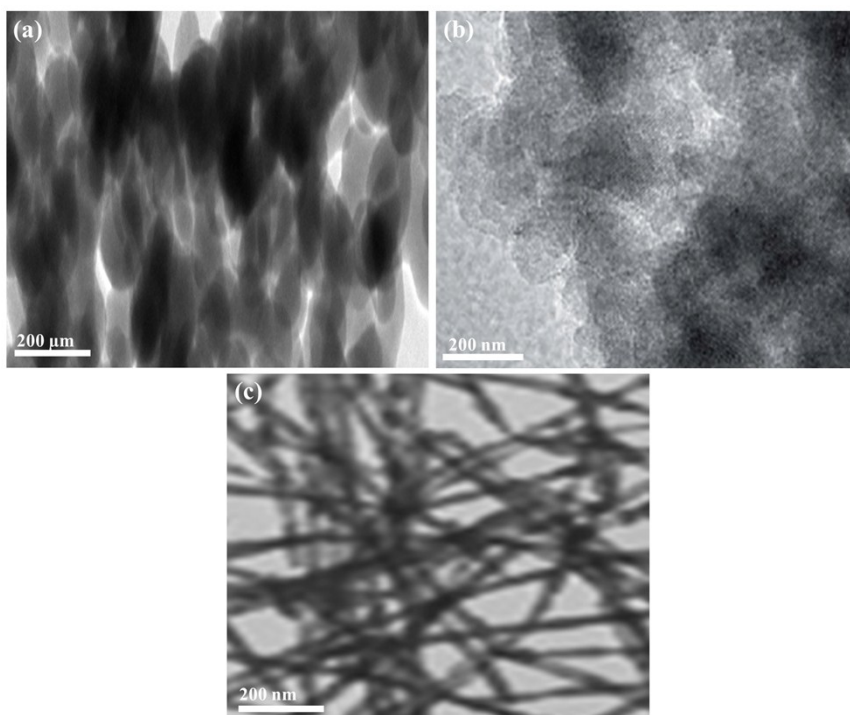

**Figure S5** (a) TEM images of aggregated CNs prepared in the absence of  $\text{NaNO}_3$  and HCL solutions, (b) CNs nanosheets obtained by the quick addition of  $\text{NaNO}_3$  and HCL solution, and (c) CNs nanowires formed using ethanol-mediated solution instead of glycol-mediated solution.

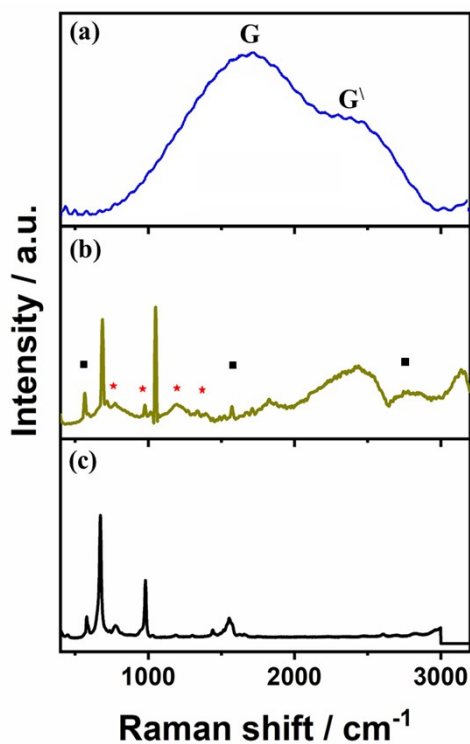

**Figure S6.** Raman spectra of (a) PtPd/CNs nanorods, (b) Pt/Pd/melon formed after polymerization of melamine, and (c) pure melamine. The asterisks and boxes indicate the Pt/Pd bonded to N and polycondensation of melamine.

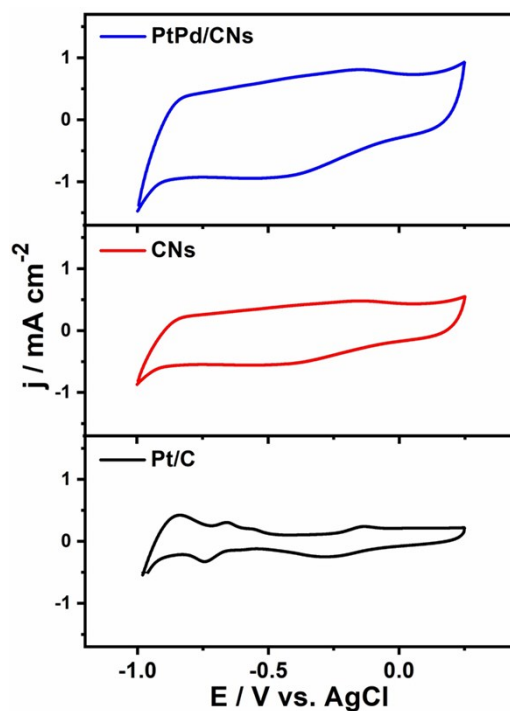

**Figure S7.** CVs of the PtPd/CNs and CNs nanorods compared to commercial Pt/C catalyst in  $N_2$ -saturated aqueous solution of 0.1 M KOH at  $50 \text{ mV s}^{-1}$  at room temperature.

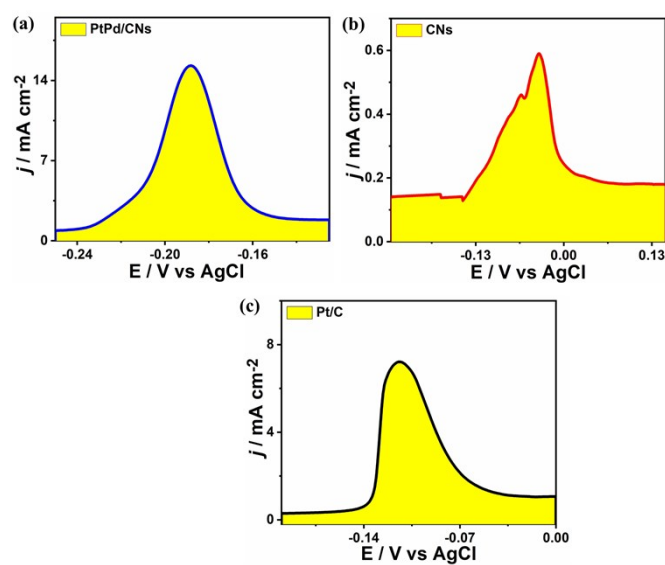

**Figure S8.** The Co-adsorbed amount over the as-synthesized materials.

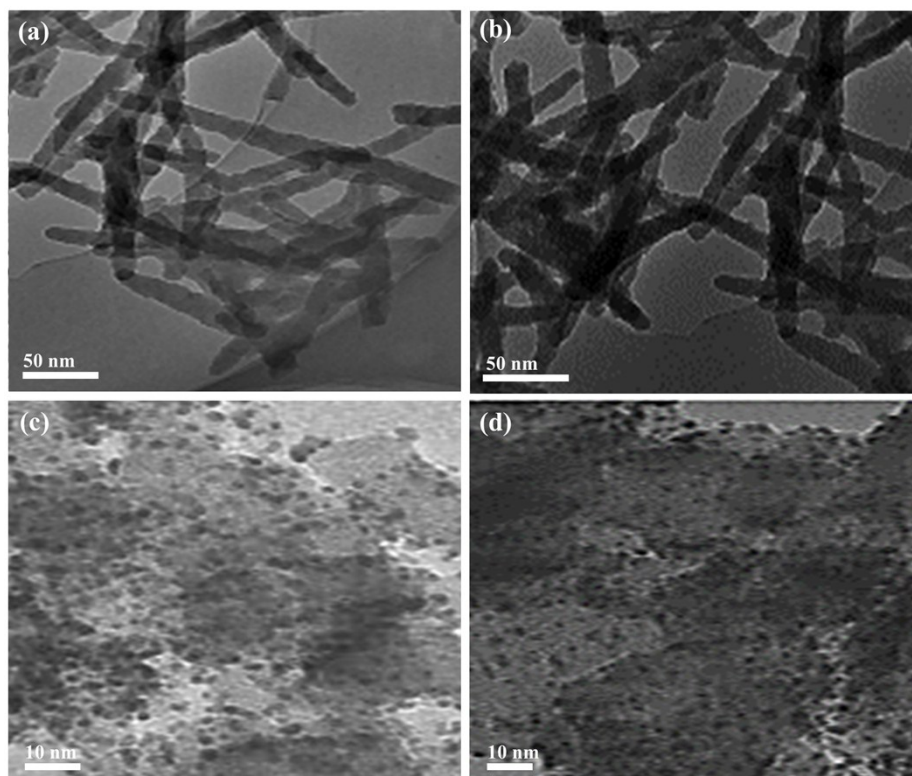

**Figure S9.** TEM image of (a-b) PtPd/CNs nanorods and (c-d) before and after CO-durability tests, respectively.

## References

1. J. Barrio, L. Lin, P. Amo-Ochoa, J. Tzadikov, G. Peng, J. Sun, F. Zamora, X. Wang and M. Shalom, *Small*, 2018, **14**, 1800633.
2. M. Tahir, N. Mahmood, J. Zhu, A. Mahmood, F. K. Butt, S. Rizwan, I. Aslam, M. Tanveer, F. Idrees and I. Shakir, *Scientific reports*, 2015, **5**, 12389.
3. H. Ma, Z. Shi, Q. Li and S. Li, *Journal of Physics and Chemistry of Solids*, 2016, **99**, 51-58.
4. Y. Wang, J. Hong, W. Zhang and R. Xu, *Catalysis Science & Technology*, 2013, **3**, 1703-1711.
5. Y. Wang, X. Wang, M. Antonietti and Y. Zhang, *ChemSusChem: Chemistry & Sustainability Energy & Materials*, 2010, **3**, 435-439.
6. Y. Li, X. Xu, P. Zhang, Y. Gong, H. Li and Y. Wang, *Rsc Advances*, 2013, **3**, 10973-10982.
7. K. Maeda, R. Kuriki, M. Zhang, X. Wang and O. Ishitani, *Journal of Materials Chemistry A*, 2014, **2**, 15146-15151.
